# Supplementary material for: Novel Pyrimidine Derivatives as Antioxidant and Anticancer Agents: Design, Synthesis and Molecular Modeling Studies
Source: MDPI journal article supplement (doi:10.3390/molecules28093913), 2023-05-05

## Supplementary Materials

# Novel Pyrimidine Derivatives as Antioxidant and Anticancer Agents: Design, Synthesis and Molecular Modeling Studies

**Malama Myriagkou <sup>1</sup>, Evangelia Papakonstantinou <sup>2</sup>, Georgia-Eirini Deligiannidou <sup>2</sup>, Alexandros Patsilidakos <sup>3,†</sup>, Christos Kontogiorgis <sup>2</sup> and Eleni Pontiki <sup>1,\*</sup>**

<sup>1</sup> Department of Pharmaceutical Chemistry, School of Pharmacy, Faculty of Health Sciences, Aristotle University of Thessaloniki, 54124 Thessaloniki, Greece; myriagkou@pharm.auth.gr

<sup>2</sup> Laboratory of Hygiene and Environmental Protection, School of Medicine, Democritus University of Thrace, 25510 Alexandroupoli, Greece; evangeliapapakonstantinou7@gmail.com (E.P.); edeligia@med.duth.gr (G.-E.D.); ckontogi@med.duth.gr (C.K.)

<sup>3</sup> Department of Drug Chemistry and Technology, Sapienza University, 00185 Rome, Italy; alexandros.patsilidakos@gmail.com

\* Correspondence: epontiki@pharm.auth.gr

† Current address: Sibylla Biotech S.p.A., 37121 Verona, Italy

**Figure S1:**  $^1\text{H}$ -NMR and  $^{13}\text{C}$ -NMR data for the novel synthesized derivatives

**2c –  $^1\text{H}$ -NMR**

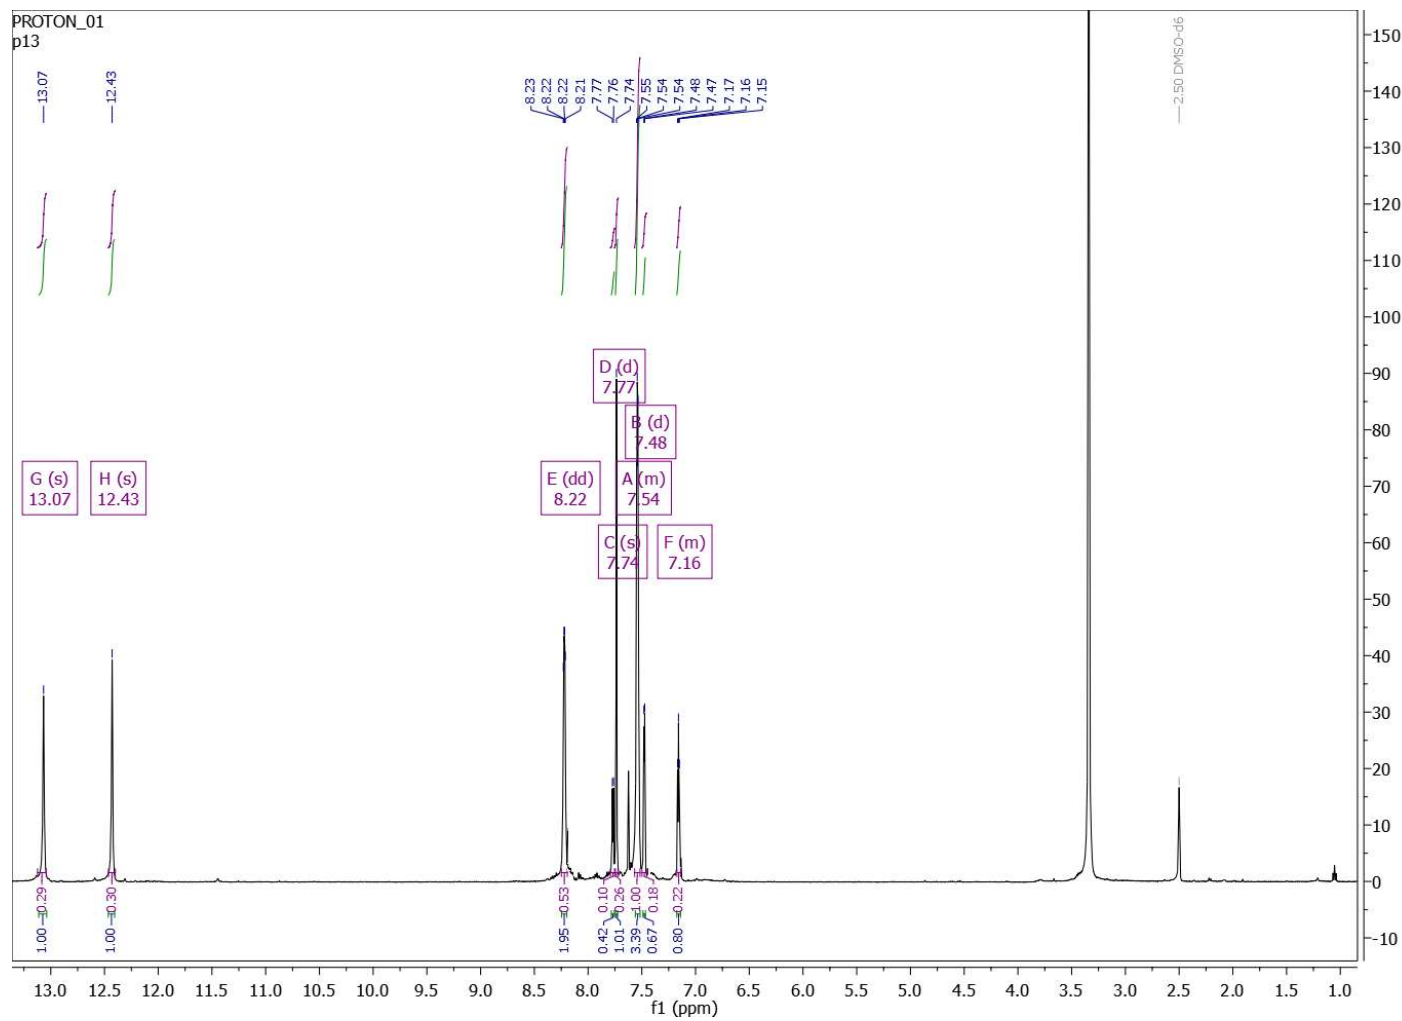

2c –  $^{13}\text{C}$ -NMR

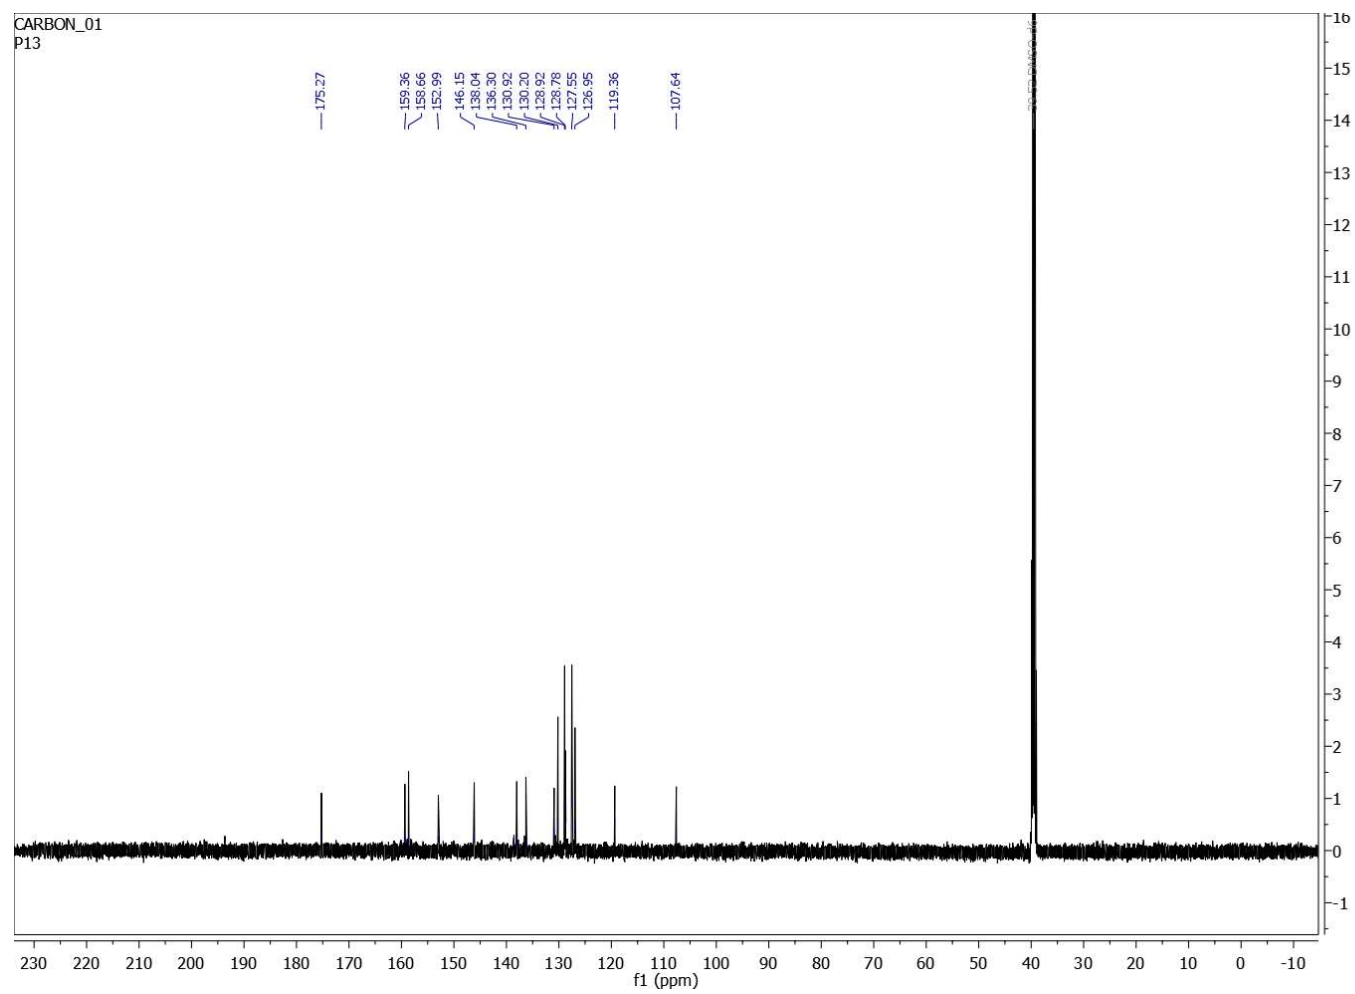

# 2g - $^1\text{H}$ -NMR

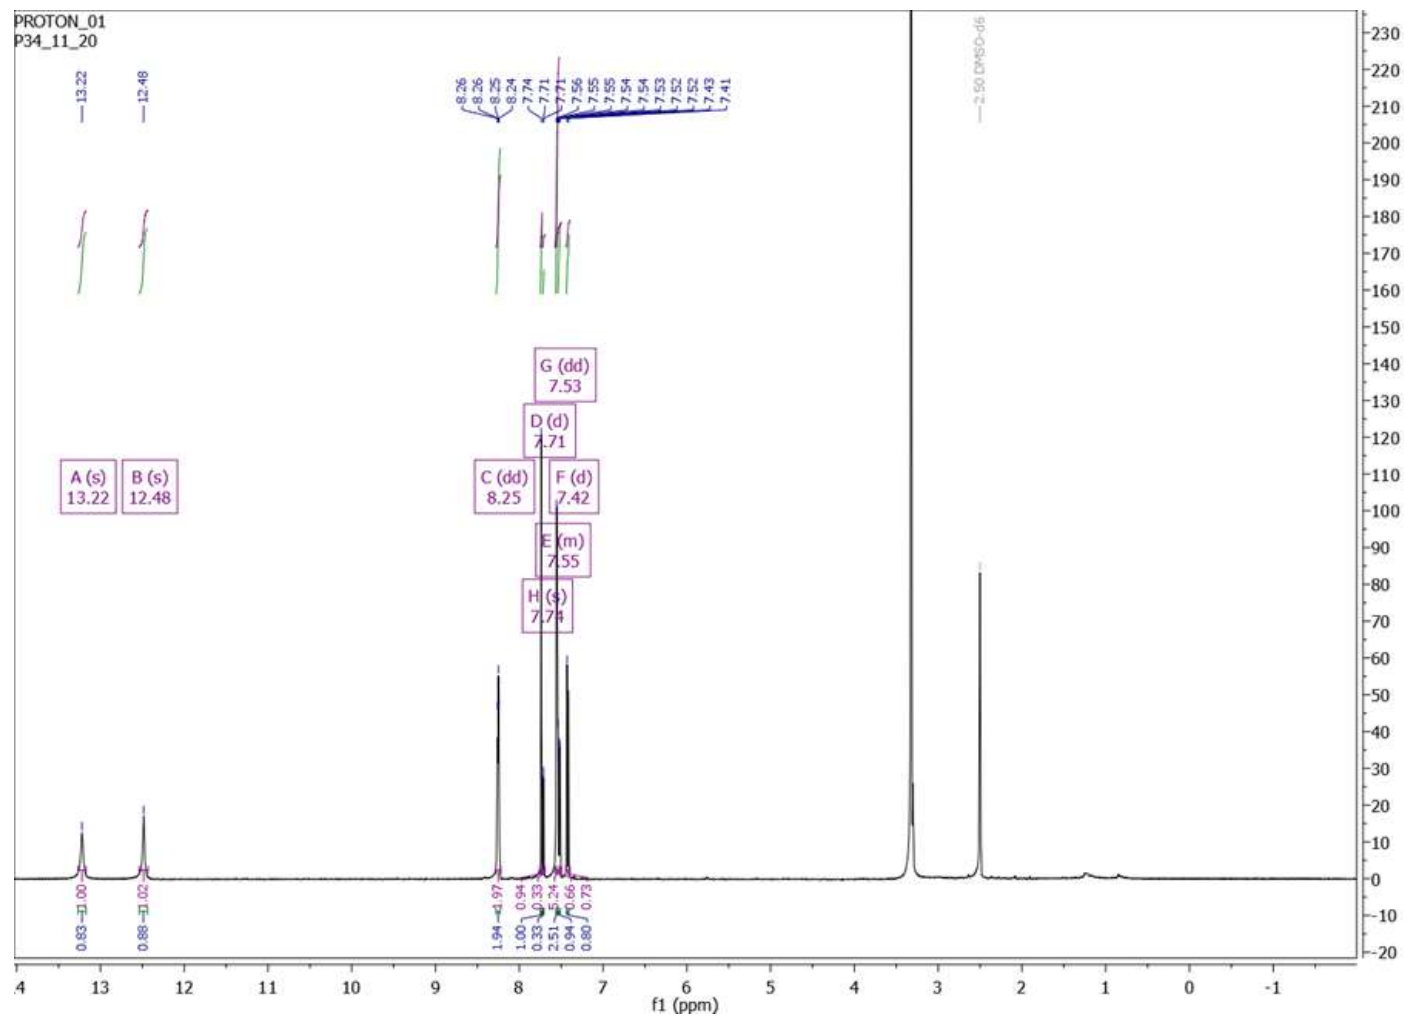

## 2g – $^{13}\text{C}$ -NMR

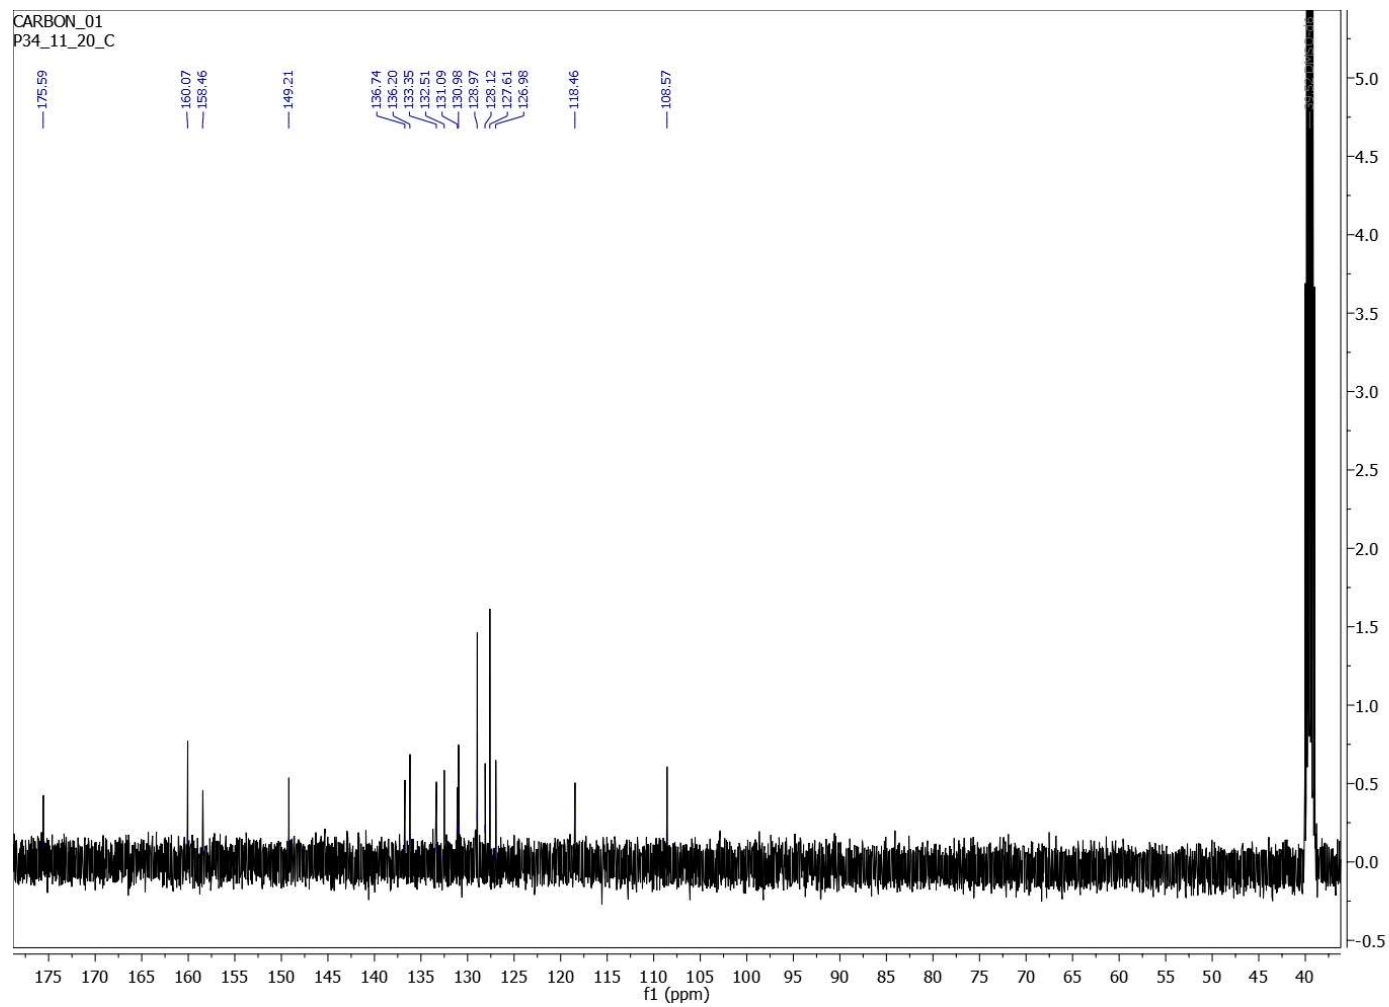

## 2h – $^1\text{H}$ -NMR

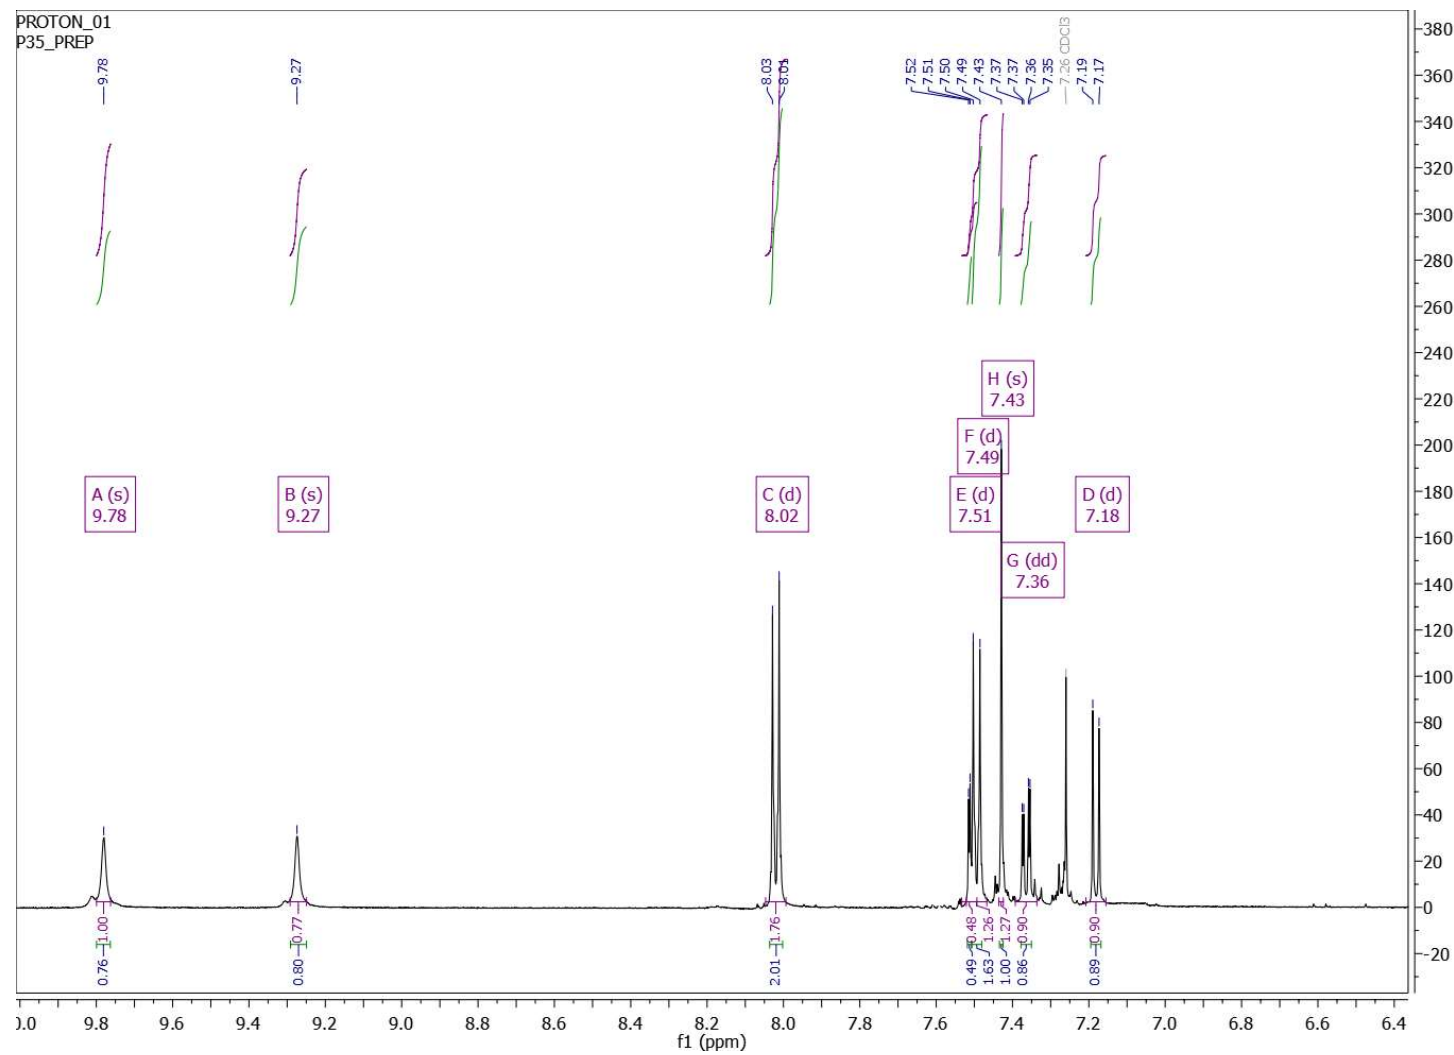

## 2h – $^{13}\text{C}$ -NMR

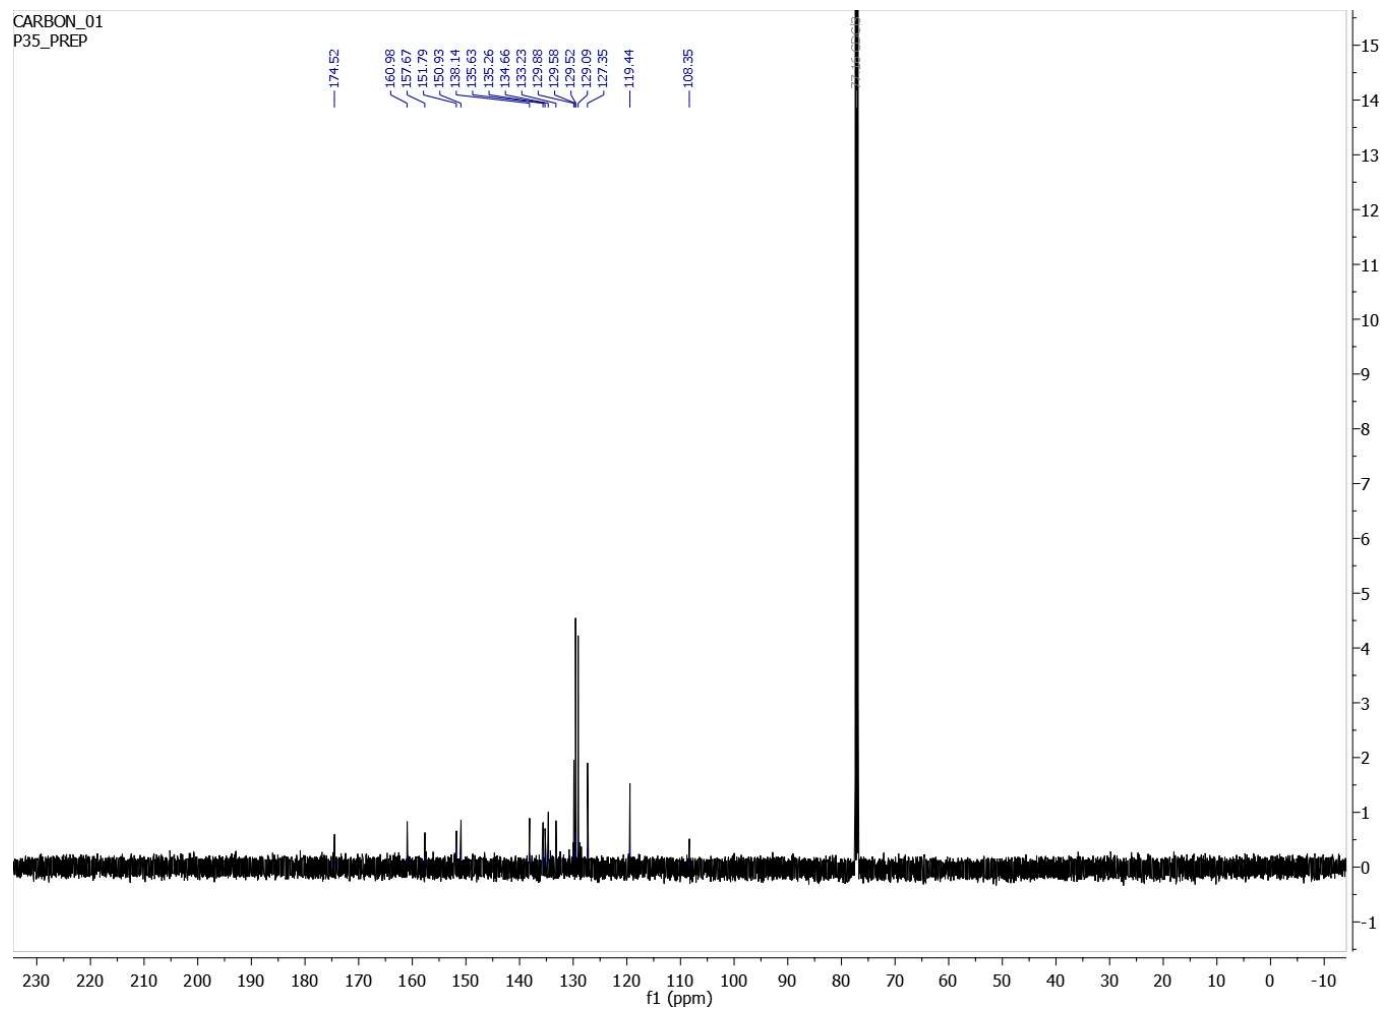

Supplement: s1 [file s1]
